# Supplementary material for: Association between psychosocial stressors and temporomandibular disorders in clinical dental students: a cross-sectional study
Source: PeerJ. 2025 Feb 27;13:e19066. doi: 10.7717/peerj.19066 (PMC11874935; doi:10.7717/peerj.19066)
Supplement: Supplemental Information 1 [file peerj-13-19066-s001.xlsx]

## Sheet: Sheet
Respondent ID	Collector ID	Start Date	End Date	IP Address	Email Address	First Name	Last Name	Custom Data 1	Name:	sex:	Age:	Level of BDS:	Maritial Status:	I felt fearful...?(شعرت بالخوف...؟)	I found it hard to focus on anything other than my anxiety...?(أجد صعوبة في التركيز على أي شيء غير القلق...؟)	My worries overwhelmed me...?(قلقي أربكني...؟)	I felt uneasy...?(أشعر بعدم الاستقرار...؟)	Have you had difficulties chewing any food?(هل تواجه أي صعوبة في مضغ الطعام)	Have you had difficulties in opening and closing mouth?(هل تواجه أي صعوبة في فتح وإغلاق فمك؟)	Have you had any painful aching in your mouth? (هل تعاني من أي ألم في الفم؟)	Have you had a sore jaw?(هل تعاني من ألم في الفك؟)	Have you had headaches? (هل عانيت من صداع بسبب ألم الفك؟)	Has it been uncomfortable to eat any foods?(هل ترى أن مضغ الطعام غير مريح؟)	Have you felt that your speach was painful because of problems with your teeth, mouth, dentures or jaws?(هل شعرت بأن التحدث مؤلم بسبب بعض المشاكل المتعلقة بالأسنان, الفم, الفك, أو تركيبات الأسنان؟)	Have you been worried by dental problems?(هل أنت قلق حيال أي مشكلة تتعلق بالأسنان؟)	Have you been self-conscious?(هل أنت مدرك عندما يكون هناك مشاكل في في الفك؟)	Have you had dental problems that have made you miserable?(هل واجهت أي من مشاكل الأسنان جعلت بائس وقلق؟)	Have you felt tense because of problems?(هل شعرت بتوتر بسبب مشاكل الفك؟)	Have you had to avoid eating some food?(هل اضطريت تجنب بعض المأكولات بسبب مشاكل الفك؟)	Have you had to interrupt meals?(هل سبق أن قطعت وجبتك بسبب مشاكل الفك؟)	Have your sleep been interrupted?(هل سبق أن قُطعَ نومك بسبب مشاكل الفك؟)	Have you been upset?(هل سبق وأن أزعجتك هذه المشكلة؟)	Has it been difficult to relax?(هل صعّب عليك الأمر عليك الاسترخاء؟)	Have you felt depressed?(هل أشعَرك الأمر بالاكتئاب)	Has your concentration been affected?(هل أَثر الأمر على تركيزك؟)	Have you been a bit irritable with other people?(هل زاد الأمر من انفعالك اتجاه الأشخاص الآخرين؟)	Have you had difficulties doing your usual jobs?(هل جعلك الأمر تواجه صعوبة في أداء المهام المعتادة؟)	Has life in general been less satisfying?(هل شعرت بأن الحياة أقل متعة بسبب هذه المشكلة؟)	Have you been unable to work to your full capacity?(هل وجدت نفسك غير قادر على أداء مهامك على أكمل وجه؟)
									Open-Ended Response	Open-Ended Response	Open-Ended Response	Open-Ended Response	Open-Ended Response	Response	Response	Response	Response	Response	Response	Response	Response	Response	Response	Response	Response	Response	Response	Response	Response	Response	Response	Response	Response	Response	Response	Response	Response	Response	Response
114321850765	424007964	2023-05-17 18:14:25	2023-05-17 18:18:47							Male	23	13	Single	Never	Never	Never	Never	Never	Never	Never	Never	Never	Never	Never	Never	Very often	Never	Never	Never	Never	Never	Never	Never	Never	Never	Never	Never	Never	Never
114321567050	424007964	2023-05-17 12:30:28	2023-05-17 12:35:06							Male	23	13	Single	Sometimes	Rarely	Sometimes	Rarely	Never	Never	Occasionally	Occasionally	Never	Never	Occasionally	Often	Very often	Often	Hardly ever	Never	Never	Never	Hardly ever	Never	Never	Never	Never	Never	Never	Never
114321567510	424007964	2023-05-17 12:30:44	2023-05-17 12:34:41							Male	23	9	Single	Rarely	Rarely	Rarely	Never	Never	Never	Hardly ever	Never	Never	Never	Never	Never	Often	Occasionally	Hardly ever	Hardly ever	Never	Never	Never	Never	Never	Never	Never	Never	Never	Never
114315994954	424007964	2023-05-10 16:52:41	2023-05-10 16:56:38							Male	21	9	unmarried	Never	Sometimes	Sometimes	Sometimes	Hardly ever	Hardly ever	Never	Never	Never	Never	Never	Occasionally	Never	Never	Never	Hardly ever	Hardly ever	Hardly ever	Hardly ever	Hardly ever	Often	Often	Often	Often	Often	Often
114314913692	424007964	2023-05-09 16:35:50	2023-05-09 16:39:12							Male	21	10	Single	Sometimes	Sometimes	Sometimes	Sometimes	Hardly ever	Never	Never	Never	Never	Never	Never	Occasionally	Often	Never	Never	Never	Never	Never	Never	Never	Never	Never	Never	Hardly ever	Never	Never
114307627492	424007964	2023-05-01 13:25:27	2023-05-09 12:27:34							Male	21	10	Single	Sometimes	Always	Often	Often	Never	Never	Hardly ever	Never	Never	Never	Never	Hardly ever	Often	Never	Never	Never	Never	Never	Never	Never	Never	Never	Never	Never	Never	Never
114314722766	424007964	2023-05-09 12:01:27	2023-05-09 12:05:00							Male	25	10	Single	Sometimes	Rarely	Often	Sometimes	Very often	Never	Often	Never	Never	Often	Never	Occasionally	Very often	Hardly ever	Never	Never	Never	Never	Never	Often	Never	Never	Never	Never	Never	Never
114307916894	424007964	2023-05-01 20:02:59	2023-05-03 19:11:28							Female	21	9	Single	Sometimes	Often	Always	Sometimes	Never	Hardly ever	Hardly ever	Occasionally	Often	Hardly ever	Never	Very often	Very often	Very often	Never	Often	Never	Never	Never	Never	Never	Never	Never	Never	Never	Never
114309185701	424007964	2023-05-03 01:28:24	2023-05-03 01:33:08							F	23	.	Single	Sometimes	Sometimes	Rarely	Often	Never	Never	Occasionally	Hardly ever	Never	Never	Never	Often	Very often	Very often	Never	Never	Never	Never	Often	Never	Occasionally	Hardly ever	Never	Never	Occasionally	Never
114309165009	424007964	2023-05-03 00:57:10	2023-05-03 01:02:10							Female	23	Lv11	Single	Often	Rarely	Sometimes	Sometimes	Never	Never	Hardly ever	Hardly ever	Never	Never	Never	Occasionally	Occasionally	Never	Hardly ever	Never	Never	Never	Hardly ever	Never	Never	Never	Never	Never	Never	Never
114309157895	424007964	2023-05-03 00:47:04	2023-05-03 00:49:47							Female	25	12	Single	Always	Always	Always	Always	Often	Never	Never	Often	Hardly ever	Never	Occasionally	Very often	Occasionally	Very often	Very often	Very often	Never	Never	Occasionally	Often	Occasionally	Occasionally	Often	Often	Often	Often
114309157261	424007964	2023-05-03 00:46:08	2023-05-03 00:48:58							Female	24	17	Single	Sometimes	Rarely	Rarely	Sometimes	Hardly ever	Occasionally	Often	Often	Hardly ever	Never	Never	Often	Often	Occasionally	Hardly ever	Occasionally	Never	Never	Occasionally	Hardly ever	Never	Never	Never	Hardly ever	Never	Never
114309155466	424007964	2023-05-03 00:43:54	2023-05-03 00:46:03							F	24	17	Dantisy	Sometimes	Sometimes	Sometimes	Sometimes	Never	Never	Never	Never	Never	Never	Never	Hardly ever	Never	Often	Occasionally	Occasionally	Occasionally	Hardly ever	Hardly ever	Never	Never	Never	Never	Never	Hardly ever	Never
114309154524	424007964	2023-05-03 00:42:32	2023-05-03 00:45:31							Female	23	17	Single	Sometimes	Never	Never	Never	Never	Never	Never	Occasionally	Never	Never	Never	Never	Often	Never	Never	Never	Never	Never	Never	Never	Never	Never	Never	Never	Never	Never
114309154216	424007964	2023-05-03 00:42:06	2023-05-03 00:44:59							F	24	17	-	Often	Often	Sometimes	Often	Never	Never	Never	Never	Never	Never	Never	Occasionally	Often	Occasionally	Occasionally	Hardly ever	Never	Occasionally	Occasionally	Occasionally	Often	Occasionally	Never	Hardly ever	Occasionally	Occasionally
114309154465	424007964	2023-05-03 00:42:16	2023-05-03 00:44:56							Female	24	18	Single	Sometimes	Sometimes	Often	Often	Hardly ever	Never	Never	Occasionally	Never	Never	Never	Never	Never	Never	Never	Never	Never	Never	Never	Occasionally	Hardly ever	Hardly ever	Hardly ever	Hardly ever	Hardly ever	Hardly ever
114307617063	424007964	2023-05-01 12:59:32	2023-05-02 23:59:22							Male	21	9	Single	Sometimes	Rarely	Often	Sometimes	Never	Occasionally	Occasionally	Never	Occasionally	Occasionally	Often	Never	Never	Never	Never	Never	Never	Hardly ever	Hardly ever	Hardly ever	Occasionally	Never	Never	Never	Never	Hardly ever
114308591963	424007964	2023-05-02 15:10:05	2023-05-02 15:12:22							M	20	9	Single	Sometimes	Never	Rarely	Sometimes	Never	Never	Hardly ever	Never	Never	Never	Never	Never	Never	Occasionally	Never	Never	Never	Never	Never	Never	Never	Never	Never	Hardly ever	Never	Never
114308589857	424007964	2023-05-02 15:07:20	2023-05-02 15:11:25							Male	22	9	Single	Sometimes	Rarely	Rarely	Rarely	Never	Never	Occasionally	Never	Hardly ever	Never	Never	Hardly ever	Hardly ever	Never	Never	Occasionally	Never	Hardly ever	Hardly ever	Hardly ever	Never	Never	Never	Never	Hardly ever	Hardly ever
114308079110	424007964	2023-05-01 23:11:16	2023-05-01 23:13:14							M	20	.	.	Sometimes	Sometimes	Often	Sometimes	Hardly ever	Hardly ever	Never	Never	Never	Never	Never	Never	Never	Hardly ever	Never	Never	Never	Never	Never	Never	Never	Never	Never	Never	Never	Never
114307953222	424007964	2023-05-01 20:42:10	2023-05-01 20:47:39							Female	21	9	Single	Sometimes	Often	Always	Often	Never	Never	Never	Never	Never	Never	Never	Never	Often	Never	Never	Never	Never	Never	Never	Often	Often	Often	Often	Often	Occasionally	Occasionally
114307871362	424007964	2023-05-01 19:10:38	2023-05-01 19:13:12							Male	21	9	Single	Sometimes	Rarely	Rarely	Never	Never	Never	Hardly ever	Never	Never	Never	Never	Very often	Often	Never	Never	Never	Never	Never	Never	Never	Never	Never	Never	Never	Never	Never
114307869486	424007964	2023-05-01 19:08:47	2023-05-01 19:10:27							Male	21	9	Non	Sometimes	Never	Sometimes	Never	Never	Never	Never	Never	Never	Never	Never	Never	Never	Never	Never	Never	Never	Very often	Occasionally	Occasionally	Often	Never	Never	Occasionally	Occasionally	Never
114307806108	424007964	2023-05-01 17:59:37	2023-05-01 18:02:04							Female	21	9	Single	Sometimes	Sometimes	Often	Often	Often	Never	Occasionally	Occasionally	Occasionally	Often	Never	Very often	Very often	Often	Often	Very often	Often	Never	Very often	Very often	Occasionally	Occasionally	Occasionally	Very often	Very often	Occasionally
114307693816	424007964	2023-05-01 15:37:24	2023-05-01 15:42:02							Male	22	9	Single	Rarely	Rarely	Never	Never	Never	Never	Occasionally	Hardly ever	Hardly ever	Never	Never	Hardly ever	Very often	Hardly ever	Hardly ever	Occasionally	Never	Never	Occasionally	Hardly ever	Never	Never	Never	Never	Never	Never
114307617138	424007964	2023-05-01 12:49:37	2023-05-01 13:03:47							Male	21	9	Single	Rarely	Rarely	Sometimes	Often	Hardly ever	Hardly ever	Never	Hardly ever	Never	Never	Never	Never	Very often	Never	Never	Hardly ever	Never	Never	Hardly ever	Hardly ever	Never	Hardly ever	Hardly ever	Hardly ever	Never	Never
114236939738	424007964	2023-02-04 19:39:10	2023-02-04 19:41:01							Male	24	12	Single	Often	Often	Often	Always	Never	Never	Never	Never	Never	Never	Never	Occasionally	Hardly ever	Often	Occasionally	Never	Never	Never	Never	Never	Never	Never	Never	Never	Never	Never
114236937854	424007964	2023-02-04 19:25:40	2023-02-04 19:37:29							Female	29	16	Married	Often	Rarely	Always	Sometimes	Never	Hardly ever	Never	Hardly ever	Hardly ever	Never	Never	Occasionally	Often	Often	Hardly ever	Never	Never	Never	Hardly ever	Hardly ever	Hardly ever	Never	Never	Never	Never	Never
114236934903	424007964	2023-02-04 19:25:47	2023-02-04 19:33:02							Female	21	18	Mared	Sometimes	Often	Sometimes	Sometimes	Often	Very often	Often	Very often	Often	Often	Often	Often	Very often	Often	Very often	Very often	Very often	Often	Very often	Very often	Very Often	Very often	Very often	Very often	Often	Often
114207555037	424007964	2022-12-20 20:12:09	2023-01-22 17:58:09							Male	22	9	Single	Sometimes	Rarely	Never	Often	Hardly ever	Never	Never	Never	Occasionally	Never	Never	Very often	Often	Very often	Never	Never	Never	Never	Never	Never	Never	Never	Never	Never	Never	Never
114226643954	424007964	2023-01-22 17:00:52	2023-01-22 17:04:44							Female	22	9	Single	Sometimes	Rarely	Often	Rarely	Hardly ever	Never	Hardly ever	Never	Hardly ever	Never	Never	Often	Hardly ever	Never	Never	Never	Never	Never	Never	Never	Never	Never	Never	Never	Never	Never
114206658492	424007964	2022-12-19 19:36:29	2023-01-22 13:36:53							Male	24	9	Single	Often	Sometimes	Always	Rarely	Never	Hardly ever	Often	Often	Very often	Never	Never	Never	Very often	Occasionally	Hardly ever	Never	Never	Never	Very often	Often	Never	Never	Never	Never	Never	Hardly ever
114210215689	424007964	2022-12-25 13:13:36	2022-12-25 13:19:12							Male	21	5	Single	Sometimes	Rarely	Rarely	Never	Never	Never	Never	Never	Never	Never	Never	Very often	Occasionally	Hardly ever	Never	Never	Never	Never	Never	Never	Never	Never	Never	Never	Never	Never
114208377707	424007964	2022-12-21 19:31:52	2022-12-21 19:33:43							Male	22	8	Studint	Rarely	Rarely	Sometimes	Sometimes	Never	Never	Never	Never	Never	Never	Never	Never	Occasionally	Never	Never	Never	Never	Never	Never	Never	Never	Never	Never	Never	Never	Never
114208197903	424007964	2022-12-21 15:45:47	2022-12-21 15:51:20							Male	20	8	Single	Sometimes	Sometimes	Often	Sometimes	Hardly ever	Hardly ever	Occasionally	Often	Often	Hardly ever	Hardly ever	Occasionally	Often	Hardly ever	Hardly ever	Never	Never	Never	Never	Never	Never	Never	Hardly ever	Hardly ever	Hardly ever	Hardly ever
114207712954	424007964	2022-12-20 23:15:03	2022-12-20 23:18:06							M	20	6	..	Sometimes	Often	Rarely	Rarely	Never	Never	Never	Never	Never	Never	Never	Never	Often	Never	Never	Never	Never	Never	Never	Never	Never	Never	Never	Never	Never	Never
114207406662	424007964	2022-12-20 17:52:28	2022-12-20 17:58:31							Male	20	8(3rd year)	.	Often	Sometimes	Rarely	Rarely	Never	Never	Never	Never	Never	Never	Hardly ever	Never	Occasionally	Never	Never	Never	Never	Never	Never	Never	Never	Never	Never	Never	Never	Never
114207188870	424007964	2022-12-20 11:27:00	2022-12-20 11:30:37							MALE	20	7	Single	Often	Rarely	Sometimes	Rarely	Never	Never	Never	Never	Never	Never	Never	Hardly ever	Very often	Never	Never	Never	Never	Never	Never	Never	Never	Never	Never	Never	Never	Never
114207184994	424007964	2022-12-20 11:17:51	2022-12-20 11:22:00							Male	22	8	Unmarried	Sometimes	Rarely	Rarely	Rarely	Never	Never	Hardly ever	Never	Occasionally	Never	Never	Occasionally	Occasionally	Occasionally	Never	Never	Hardly ever	Never	Never	Never	Never	Never	Occasionally	Hardly ever	Never	Never
114207175624	424007964	2022-12-20 10:56:53	2022-12-20 11:02:55							Male	21	8	Single	Sometimes	Rarely	Rarely	Never	Never	Never	Hardly ever	Hardly ever	Never	Never	Never	Very often	Occasionally	Never	Hardly ever	Never	Never	Never	Hardly ever	Hardly ever	Never	Hardly ever	Never	Never	Never	Never
114207158289	424007964	2022-12-20 10:12:12	2022-12-20 10:21:48							Male	20	8	Single	Rarely	Never	Rarely	Sometimes	Hardly ever	Never	Never	Never	Never	Never	Never	Never	Hardly ever	Never	Never	Never	Never	Never	Never	Never	Never	Never	Never	Never	Never	Never
114207160199	424007964	2022-12-20 10:16:27	2022-12-20 10:19:16							Male	21	8	Single	Never	Never	Never	Never	Never	Never	Never	Never	Never	Never	Never	Never	Often	Often	Never	Never	Never	Never	Never	Never	Never	Never	Never	Never	Very often	Very often
114207160366	424007964	2022-12-20 10:16:54	2022-12-20 10:19:12							Male	20	8	Single	Never	Never	Never	Never	Never	Never	Never	Never	Never	Never	Never	Often	Often	Never	Often	Never	Never	Often	Never	Never	Never	Never	Never	Never	Never	Never
114207152280	424007964	2022-12-20 09:56:01	2022-12-20 10:12:00							Male	21	8	Unmarried	Rarely	Rarely	Never	Rarely	Never	Hardly ever	Never	Never	Hardly ever	Hardly ever	Never	Never	Very often	Hardly ever	Hardly ever	Never	Never	Never	Never	Never	Occasionally	Never	Never	Never	Never	Never
114207152181	424007964	2022-12-20 09:55:43	2022-12-20 10:00:43							Male	21	8	Single	Sometimes	Rarely	Sometimes	Sometimes	Never	Never	Often	Occasionally	Occasionally	Never	Never	Never	Never	Hardly ever	Never	Hardly ever	Never	Occasionally	Never	Hardly ever	Occasionally	Occasionally	Often	Occasionally	Hardly ever	Occasionally
114207152682	424007964	2022-12-20 09:57:12	2022-12-20 10:00:06							Male	21	8	0	Sometimes	Never	Rarely	Never	Never	Never	Never	Never	Never	Never	Never	Never	Very often	Never	Never	Never	Never	Never	Never	Never	Never	Never	Never	Never	Never	Never
114206931637	424007964	2022-12-20 00:22:08	2022-12-20 01:43:14							Female	22	9	Good	Rarely	Never	Never	Rarely	Hardly ever	Never	Never	Never	Hardly ever	Never	Never	Hardly ever	Often	Hardly ever	Never	Never	Hardly ever	Never	Never	Never	Never	Never	Never	Never	Never	Never
114206806830	424007964	2022-12-19 21:05:18	2022-12-19 22:43:42							F	22	Lvl 18🎓(12)	Single	Never	Never	Never	Never	Never	Never	Never	Never	Never	Never	Never	Never	Hardly ever	Never	Never	Never	Never	Never	Never	Never	Never	Never	Never	Never	Never	Never
114206723826	424007964	2022-12-19 20:53:59	2022-12-19 20:56:16							Male	23	10	Single	Never	Rarely	Rarely	Never	Never	Never	Never	Never	Never	Never	Never	Never	Never	Never	Never	Never	Never	Never	Never	Never	Never	Never	Never	Never	Never	Never
114206707611	424007964	2022-12-19 20:33:38	2022-12-19 20:38:24							Male	21	6	Single	Sometimes	Sometimes	Often	Often	Never	Never	Never	Never	Never	Never	Never	Hardly ever	Very often	Hardly ever	Never	Occasionally	Never	Never	Hardly ever	Hardly ever	Hardly ever	Hardly ever	Never	Never	Never	Never
114206661061	424007964	2022-12-19 19:36:13	2022-12-19 19:41:39							Male	24	9	Single	Always	Often	Always	Always	Never	Often	Often	Never	Never	Never	Never	Often	Occasionally	Occasionally	Never	Often	Never	Never	Occasionally	Often	Never	Never	Never	Often	Never	Never
114206639702	424007964	2022-12-19 19:15:36	2022-12-19 19:22:01							Male	22	Level 9	Single	Sometimes	Often	Sometimes	Sometimes	Never	Never	Never	Never	Never	Never	Never	Never	Often	Never	Never	Hardly ever	Never	Never	Never	Never	Never	Never	Never	Never	Never	Never
114206642047	424007964	2022-12-19 19:18:03	2022-12-19 19:21:56							Male	21	9	Single	Sometimes	Often	Sometimes	Sometimes	Never	Never	Never	Never	Never	Never	Never	Hardly ever	Occasionally	Occasionally	Never	Never	Never	Never	Never	Never	Never	Never	Never	Never	Never	Never
114206635237	424007964	2022-12-19 19:10:43	2022-12-19 19:14:25							Male	21	6	Single	Never	Never	Never	Never	Never	Never	Never	Never	Never	Never	Never	Never	Never	Never	Never	Never	Never	Never	Never	Never	Never	Never	Never	Never	Never	Never
114206602097	424007964	2022-12-19 18:34:28	2022-12-19 18:36:33							Male	23	10	Single	Sometimes	Often	Rarely	Sometimes	Never	Never	Never	Never	Never	Never	Never	Hardly ever	Very often	Hardly ever	Hardly ever	Never	Never	Never	Never	Never	Never	Never	Never	Never	Never	Never
114206596836	424007964	2022-12-19 18:28:04	2022-12-19 18:31:14							Female	24	12	Unmarried	Sometimes	Often	Always	Sometimes	Occsionally	Occasionally	Hardly ever	Often	Hardly ever	Hardly ever	Often	Very often	Often	Very often	Often	Hardly ever	Never	Never	Often	Often	Hardly ever	Occasionally	Hardly ever	Hardly ever	Hardly ever	Hardly ever
114206580349	424007964	2022-12-19 18:09:11	2022-12-19 18:24:26							Male	22	14	Single	Never	Never	Never	Never	Never	Never	Never	Never	Never	Never	Never	Often	Very often	Often	Very often	Very often	Never	Very often	Very often	Very often	Very Often	Very often	Never	Never	Hardly ever	Never
114206585135	424007964	2022-12-19 18:14:36	2022-12-19 18:17:22							M	22	Lvl14	Student	Rarely	Sometimes	Sometimes	Often	Hardly ever	Hardly ever	Hardly ever	Hardly ever	Hardly ever	Never	Never	Hardly ever	Often	Occasionally	Hardly ever	Occasionally	Hardly ever	Never	Never	Hardly ever	Hardly ever	Hardly ever	Never	Hardly ever	Hardly ever	Hardly ever
114206493542	424007964	2022-12-19 16:23:14	2022-12-19 16:25:03							Male	32	10	Single	Sometimes	Rarely	Sometimes	Sometimes	Never	Never	Never	Never	Never	Never	Never	Never	Very often	Never	Never	Never	Never	Never	Never	Never	Never	Never	Never	Never	Never	Never
114206488571	424007964	2022-12-19 16:15:48	2022-12-19 16:19:50							Male	24	14	Single 💔🫡	Rarely	Always	Sometimes	Always	Never	Never	Never	Never	Never	Hardly ever	Occasionally	Often	Very often	Very often	Occasionally	Hardly ever	Never	Never	Never	Never	Never	Occasionally	Never	Never	Never	Never
114206487487	424007964	2022-12-19 16:14:46	2022-12-19 16:18:34							Male	23	11	Single	Sometimes	Sometimes	Often	Sometimes	Hardly ever	Never	Never	Never	Hardly ever	Never	Never	Occasionally	Often	Occasionally	Very often	Never	Occasionally	Occasionally	Occasionally	Occasionally	Occasionally	Occasionally	Hardly ever	Occasionally	Often	Occasionally
114206484528	424007964	2022-12-19 16:10:18	2022-12-19 16:14:12							Male	23	14	Single	Sometimes	Sometimes	Always	Sometimes	Never	Never	Never	Never	Never	Never	Never	Hardly ever	Hardly ever	Hardly ever	Never	Never	Never	Never	Never	Hardly ever	Never	Never	Never	Never	Never	Never
114206459387	424007964	2022-12-19 15:31:50	2022-12-19 15:35:16							Female	23	5th year	Single	Often	Often	Always	Always	Never	Never	Never	Never	Never	Never	Never	Never	Very often	Never	Never	Never	Never	Never	Never	Never	Never	Never	Never	Never	Never	Never
114206439499	424007964	2022-12-19 14:58:55	2022-12-19 15:01:56							Female	23	6th year lvl 12	Single	Often	Always	Always	Always	Often	Occasionally	Hardly ever	Occasionally	Hardly ever	Never	Never	Hardly ever	Often	Hardly ever	Never	Occasionally	Never	Never	Never	Occasionally	Occasionally	Very often	Very often	Very often	Very often	Often
114206435405	424007964	2022-12-19 14:51:29	2022-12-19 14:54:24							Female	23	5 years	Single	Rarely	Rarely	Rarely	Rarely	Hardly ever	Never	Never	Hardly ever	Never	Never	Never	Never	Hardly ever	Never	Never	Never	Never	Never	Never	Never	Never	Never	Never	Never	Never	Never
114206395606	424007964	2022-12-19 13:35:56	2022-12-19 13:42:25							F	24	9	Single	Sometimes	Rarely	Rarely	Never	Never	Never	Never	Never	Never	Never	Never	Hardly ever	Hardly ever	Hardly ever	Never	Never	Never	Never	Never	Hardly ever	Never	Never	Never	Never	Never	Never
114206395471	424007964	2022-12-19 13:35:46	2022-12-19 13:40:08							F	21	8	S	Often	Often	Often	Always	Never	Never	Never	Occasionally	Never	Never	Never	Never	Very often	Never	Never	Never	Hardly ever	Occasionally	Occasionally	Occasionally	Never	Often	Hardly ever	Often	Hardly ever	Occasionally
114206218983	424007964	2022-12-19 07:12:01	2022-12-19 07:25:11							Female	20	8	Single	Sometimes	Often	Rarely	Rarely	Often	Never	Occasionally	Hardly ever	Never	Occasionally	Never	Often	Often	Often	Never	Hardly ever	Hardly ever	Never	Hardly ever	Never	Never	Hardly ever	Never	Never	Never	Never
114206189921	424007964	2022-12-19 06:01:35	2022-12-19 06:05:10							Female	20	6	Single	Sometimes	Sometimes	Never	Never	Never	Never	Never	Never	Occasionally	Never	Never	Very often	Very often	Often	Often	Never	Never	Never	Never	Never	Never	Never	Never	Hardly ever	Hardly ever	Hardly ever
114206107535	424007964	2022-12-19 02:19:55	2022-12-19 02:23:06							Femal	20	6	‘C	Always	Always	Always	Rarely	Never	Never	Never	Never	Never	Never	Never	Never	Never	Never	Never	Never	Never	Never	Never	Never	Never	Never	Never	Never	Never	Never
114206075098	424007964	2022-12-18 22:33:21	2022-12-19 00:12:37							Female	23	16	Single	Sometimes	Always	Always	Sometimes	Never	Never	Never	Never	Never	Never	Never	Never	Occasionally	Never	Never	Never	Never	Never	Never	Never	Often	Occasionally	Occasionally	Often	Occasionally	Very often
114206054966	424007964	2022-12-18 22:43:28	2022-12-18 22:46:58							Male	23	8	Single	Often	Sometimes	Rarely	Never	Never	Never	Occasionally	Often	Never	Never	Often	Occasionally	Often	Occasionally	Occasionally	Never	Never	Never	Hardly ever	Never	Never	Never	Never	Never	Never	Never
114206054154	424007964	2022-12-18 22:41:28	2022-12-18 22:44:02							female	20	6	single	Sometimes	Rarely	Sometimes	Rarely	Often	Never	Often	Often	Occasionally	Often	Hardly ever	Occasionally	Very often	Often	Occasionally	Hardly ever	Never	Never	Hardly ever	Never	Never	Never	Hardly ever	Never	Hardly ever	Hardly ever
114206053807	424007964	2022-12-18 22:40:14	2022-12-18 22:42:46							Female	22	12	singal	Sometimes	Rarely	Sometimes	Never	Never	Never	Never	Never	Never	Never	Never	Never	Never	Never	Never	Never	Never	Never	Never	Never	Never	Never	Never	Never	Never	Never
114206052230	424007964	2022-12-18 22:33:50	2022-12-18 22:36:45							F	23	7	S	Rarely	Rarely	Sometimes	Rarely	Never	Never	Often	Occasionally	Never	Never	Never	Occasionally	Very often	Never	Never	Never	Never	Never	Never	Never	Never	Never	Occasionally	Occasionally	Occasionally	Occasionally
114206045525	424007964	2022-12-18 22:00:57	2022-12-18 22:34:55							Female	21	7	Single	Often	Sometimes	Sometimes	Sometimes	Never	Never	Never	Never	Never	Never	Never	Often	Very often	Never	Often	Occasionally	Never	Never	Never	Never	Never	Never	Never	Never	Never	Never
114206049512	424007964	2022-12-18 22:23:14	2022-12-18 22:26:57							Female	20	5	لا اعلم	Never	Rarely	Rarely	Sometimes	Never	Never	Never	Never	Never	Never	Never	Occasionally	Often	Hardly ever	Hardly ever	Hardly ever	Never	Never	Never	Never	Never	Never	Never	Never	Never	Never
114206047154	424007964	2022-12-18 22:02:31	2022-12-18 22:17:51							Female	21	8	Single	Often	Sometimes	Sometimes	Rarely	Occsionally	Never	Occasionally	Occasionally	Never	Occasionally	Occasionally	Often	Never	Often	Hardly ever	Hardly ever	Never	Never	Hardly ever	Never	Never	Occasionally	Occasionally	Occasionally	Occasionally	Occasionally
114206042405	424007964	2022-12-18 21:58:43	2022-12-18 22:03:24							Male	25	11	اعزب	Sometimes	Sometimes	Always	Sometimes	Never	Never	Never	Never	Never	Never	Never	Often	Occasionally	Never	Never	Never	Never	Never	Never	Never	Never	Never	Never	Never	Never	Never
114206041537	424007964	2022-12-18 21:55:45	2022-12-18 22:01:51							F	23	Level 10-11 previously	Single	Always	Sometimes	Often	Always	Never	Never	Occasionally	Occasionally	Occasionally	Never	Never	Often	Often	Often	Often	Never	Never	Never	Occasionally	Hardly ever	Never	Never	Never	Never	Occasionally	Never
114206040671	424007964	2022-12-18 21:53:41	2022-12-18 21:58:10							Female	23	10	Single	Sometimes	Sometimes	Rarely	Rarely	Occsionally	Hardly ever	Occasionally	Often	Often	Hardly ever	Hardly ever	Occasionally	Occasionally	Hardly ever	Occasionally	Hardly ever	Hardly ever	Hardly ever	Occasionally	Occasionally	Hardly ever	Hardly ever	Occasionally	Never	Hardly ever	Hardly ever
114206039911	424007964	2022-12-18 21:50:42	2022-12-18 21:54:24							Female	23	16	Singal	Often	Sometimes	Sometimes	Sometimes	Never	Never	Never	Never	Never	Never	Never	Occasionally	Very often	Never	Never	Never	Never	Never	Never	Never	Never	Never	Never	Never	Never	Never
114206039718	424007964	2022-12-18 21:50:36	2022-12-18 21:53:54							Female	24	10	Single	Sometimes	Never	Rarely	Never	Hardly ever	Never	Never	Never	Never	Never	Never	Occasionally	Often	Occasionally	Hardly ever	Never	Never	Never	Never	Never	Never	Never	Never	Never	Never	Never
